# Supplementary material for: A non-luminescent polymorph of [(cyclohexyl isocyanide)2Au]PF6 that becomes luminescent upon grinding or exposure to dichloromethane vapor
Source: Royal Society of Chemistry journal article supplement (doi:10.1039/d0cc06161a), 2020-12-13
Supplement: d0cc06161a1.pdf [file d0cc06161a1.pdf]

Supporting Information for

**A Non-Luminescent Polymorph of [(Cyclohexyl  
Isocyanide)<sub>2</sub>Au]PF<sub>6</sub> that Becomes Luminescent Upon Grinding  
or Exposure to Dichloromethane Vapor**

Lucy M. C. Luong, Marilyn M. Olmstead, Alan L. Balch

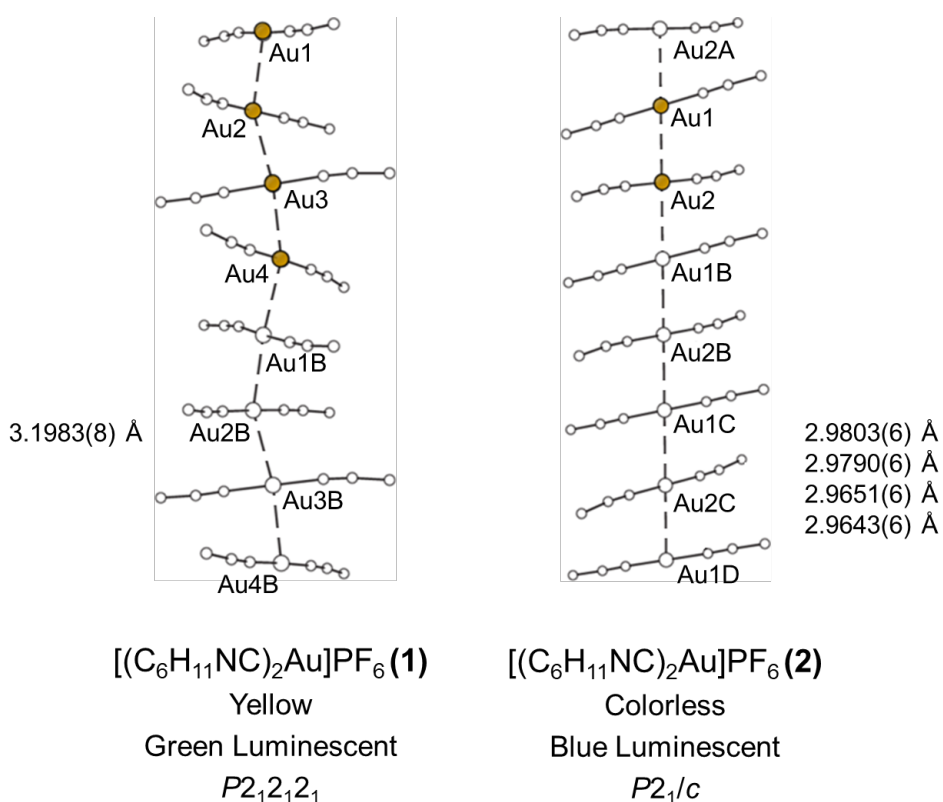

**Figure SI-1.** The columnar structures of green luminescent [(C<sub>6</sub>H<sub>11</sub>NC)<sub>2</sub>Au]PF<sub>6</sub> (**1**) and blue luminescent [(C<sub>6</sub>H<sub>11</sub>NC)<sub>2</sub>Au]PF<sub>6</sub> (**2**). For clarity, only one carbon atom of each cyclohexyl ring is shown. The aurophilic contacts are shown as solid lines and those distances are given at the bottom of the figure. From data in R. L. White-Morris, M. M. Olmstead and A. L. Balch, *J. Am. Chem. Soc.* 2003, **125**, 1033-1040.

**Table 1. Crystallographic data for polymorphs of [(C<sub>6</sub>H<sub>11</sub>NC)<sub>2</sub>Au<sup>I</sup>](PF<sub>6</sub>)**

|                                                | [(C <sub>6</sub> H <sub>11</sub> NC) <sub>2</sub> Au <sup>I</sup> ](PF <sub>6</sub> ) <sup>a</sup> | [(C <sub>6</sub> H <sub>11</sub> NC) <sub>2</sub> Au <sup>I</sup> ](PF <sub>6</sub> ) <sup>a</sup> | [(C <sub>6</sub> H <sub>11</sub> NC) <sub>2</sub> Au <sup>I</sup> ](PF <sub>6</sub> ) |
|------------------------------------------------|----------------------------------------------------------------------------------------------------|----------------------------------------------------------------------------------------------------|---------------------------------------------------------------------------------------|
| color/(luminescence)/habit                     | Colorless (none) block                                                                             | Yellow (green) plate                                                                               | Colorless (blue) needle                                                               |
| chemical formula                               | C <sub>14</sub> H <sub>22</sub> AuF <sub>6</sub> N <sub>2</sub> P                                  | C <sub>14</sub> H <sub>22</sub> AuF <sub>6</sub> N <sub>2</sub> P                                  | C <sub>14</sub> H <sub>22</sub> AuF <sub>6</sub> N <sub>2</sub> P                     |
| formula weight                                 | 560.27                                                                                             | 560.27                                                                                             | 560.27                                                                                |
| crystal system                                 | monoclinic                                                                                         | orthorhombic                                                                                       | monoclinic                                                                            |
| space group                                    | <i>C2/c</i>                                                                                        | <i>P2<sub>1</sub>2<sub>1</sub>2<sub>1</sub></i>                                                    | <i>P2<sub>1</sub>/c</i>                                                               |
| <i>a</i> (Å)                                   | 16.8465(11)                                                                                        | 11.5235(7)                                                                                         | 6.3644(5)                                                                             |
| <i>b</i> (Å)                                   | 7.9802(5)                                                                                          | 24.1416(15)                                                                                        | 16.9806(15)                                                                           |
| <i>c</i> (Å)                                   | 14.5677(15)                                                                                        | 26.0516(16)                                                                                        | 16.7224(13)                                                                           |
| <i>α</i> (deg)                                 | 90                                                                                                 | 90                                                                                                 | 90                                                                                    |
| <i>β</i> (deg)                                 | 118.6160(10)                                                                                       | 90                                                                                                 | 92.693(3)                                                                             |
| <i>γ</i> (deg)                                 | 90                                                                                                 | 90                                                                                                 | 90                                                                                    |
| <i>V</i> (Å <sup>3</sup> )                     | 1719.2(2)                                                                                          | 7247.4(8)                                                                                          | 1805.2(3)                                                                             |
| <i>Z</i>                                       | 4                                                                                                  | 16                                                                                                 | 4                                                                                     |
| <i>T</i> (K)                                   | 100(2)                                                                                             | 91(2)                                                                                              | 91(2)                                                                                 |
| <i>λ</i> (Å)                                   | 0.71073                                                                                            | 0.71073                                                                                            | 0.71073                                                                               |
| <i>ρ</i> (g/cm <sup>3</sup> )                  | 2.165                                                                                              | 2.054                                                                                              | 2.061                                                                                 |
| <i>μ</i> (mm <sup>-1</sup> )                   | 8.709                                                                                              | 8.264                                                                                              | 8.264                                                                                 |
| <i>R</i> <sub>1</sub> (obsd data) <sup>b</sup> | 0.0128                                                                                             | 0.055                                                                                              | 0.019                                                                                 |

<sup>a</sup>From data in R. L. White-Morris, M. M. Olmstead and A. L. Balch, *J. Am. Chem. Soc.* 2003, **125**, 1033-1040.

$$^b R_1 = (\sum ||F_o| - |F_c||) / \sum |F_o|$$

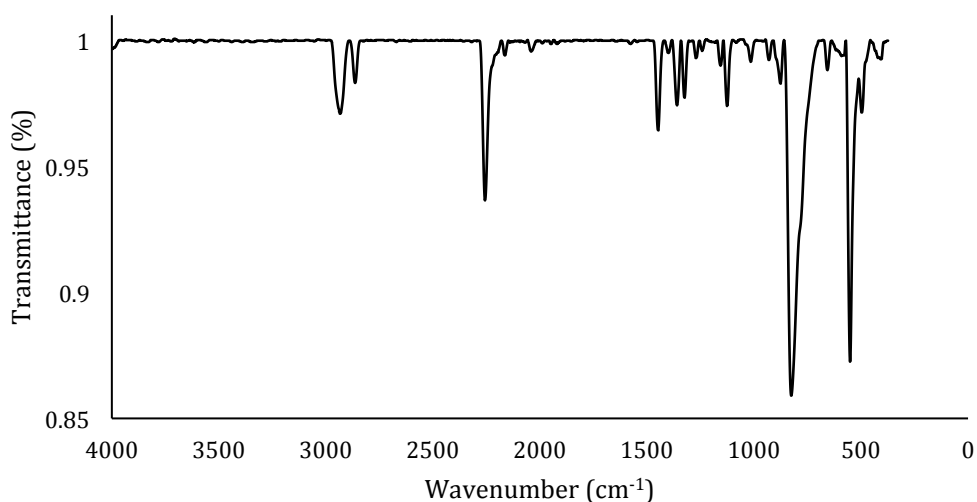

**Figure SI-2.** Infrared spectrum of the colorless, non-luminescent polymorph of  $[(C_6H_{11}NC)_2Au]PF_6$  with the isonitrile stretching band at  $2257\text{ cm}^{-1}$  and P-F vibrations at  $828$  and  $556\text{ cm}^{-1}$ .

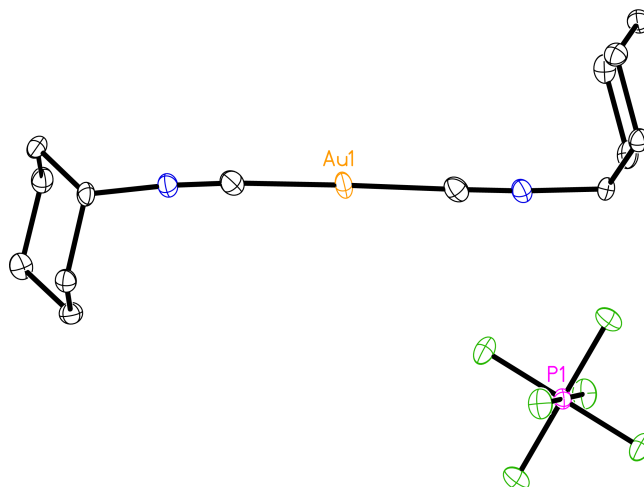

**Figure SI-3.** The molecular structure of the colorless, non-luminescent polymorph of  $[(C_6H_{11}NC)_2Au]PF_6$ . Hydrogen atoms are omitted for clarity. Thermal ellipsoids are drawn at 50%. Atom colors are: Au, orange; C, black; N, blue; P, purple; F, green. Selected bond distances ( $\text{\AA}$ ): Au1-C1, 1.975(2); N1-C1, 1.140(3); N1-C2, 1.455(3); P1-F1, 1.6065(12); P1-F2, 1.6060(13); P1-F3, 1.6032(11). Selected bond angles (deg): C1-Au1-C1', 177.90(11); N1-C1-Au1, 176.71(19); C1-N1-C2, 176.0(2); N1-C2-C7, 109.44(16); N1-C2-C3, 108.20(16).
